# Supplementary material for: Prevalence of impaired glucose tolerance and other types of dysglycaemia among young twins and singletons in Guinea-Bissau
Source: Springer Nature journal article supplement (doi:10.1186/s12902-016-0126-6), 2016-08-04
Supplement: MOESM1 [file 10559370]

BMC Endocrine Disorders.

Title: Prevalence of impaired glucose tolerance and other types of dysglycaemia among young twins and singletons in Guinea-Bissau.

Authors: D. E. Hennild, M. Bjerregaard-Andersen, L. C. Joaquim, K. Christensen M. Sodemann, H. Beck-Nielsen and D. M. Jensen.

**Additional file 1: Nutritional intake among twins and singletons.**

|                                           | <b>Twins</b><br>N = 209 | <b>Singletons</b><br>N = 182 | <b>P</b> |
|-------------------------------------------|-------------------------|------------------------------|----------|
| Eats varied food                          | 206/209 (99%)           | 179/180 (99%)                | 0.41     |
| Eats breakfast                            | 198/205 (97%)           | 178/181 (98%)                | 0.27     |
| Eats fish every day                       | 158/209 (76%)           | 172/180 (96%)                | <0.001   |
| Eats meat every day                       | 3/208 (1.4%)            | 7/180 (3.9%)                 | 0.13     |
| Eats meat several times a week            | 87/208 (42%)            | 95/180 (53%)                 | 0.03     |
| Eats vegetables every day                 | 13/209 (6.2%)           | 13/180 (7.2%)                | 0.70     |
| Eats vegetables several times a week      | 92/209 (44%)            | 65/180 (36%)                 | 0.11     |
| Eats sweets every day                     | 38/209 (18%)            | 22/180(12%)                  | 0.10     |
| Eats oily food every day                  | 115/208 (55%)           | 131/180 (73%)                | <0.001   |
| Eats oily food a couple of times a week   | 92/208 (44%)            | 47/180 (26%)                 | <0.001   |
| Eats deep fried food every day            | 27/208 (13%)            | 39/180 (22%)                 | 0.02     |
| Eats deep fried food several times a week | 138/208 (66%)           | 93/180 (52%)                 | 0.003    |
| Eats rice every day                       | 207/209 (99%)           | 181/181 (100%)               | 0.20     |
| Eats potatoes every day                   | 5/208 (2.4%)            | 16/179 (8.9%)                | 0.005    |
| Eats potatoes several times a week        | 38/208 (18%)            | 88/179 (49%)                 | <0.001   |
| Primarily drinks water                    | 204/209 (98%)           | 177/180 (98%)                | 0.61     |
| Primarily drinks milk, juice/soda, other  | 5/209 (2.4%)            | 3/180 (1.7%)                 | 0.61     |
